# Supplementary material
Source: Research Square preprint supplement (doi:10.21203/rs.3.rs-8512596/v1)
Supplement: Supplementary file 1 [file 77bd52e44278630ef5aa6985.docx]

**Anonymous survey:**

Diagnosing the needs and problems of the English Division students at Wrocław Medical University in a cross-cultural context.

You are being invited to participate in a research study about the needs and challenges of ED students while studying in Poland at Wrocław Medical University.

**Your experiences and opinions are important for us!**

The study is conducted by Department of Medical Humanities and Social Sciences at Wrocław Medical University.

This survey is anonymous. Do not write your name on the survey. No one will be able to identify you or your answers, and no one will know whether or not you participated in the study.

Your participation in this study is voluntary. By completing the survey, you are voluntarily agreeing to participate.

1. What is the most difficult about studying in Poland: [rank from 1 minimum to 7 maximum of importance]

separation from family and friends:

conditions of living (accommodation, public transport):

the way classes are organized:

curriculum:

cultural differences:

language difference:

long and difficult transport back home:

other…

1. How overall do you assess the communication skills of your teachers at Wrocław Medical University? (rate on scale from 1 to 5 whereby: 1 = insufficient, 2 = sufficient 3 = good 4 = very good 5= excellent)
2. What are the most common problems while communicating with Polish teachers at the Wrocław Medical University?

[check from 1 minimum to 7 maximum of relevance]

Verbal misunderstanding (misunderstanding about the meaning of the words)

Vocal misunderstanding (tone of voice)

Non-verbal misunderstanding (body language)

Others:

1. What are the most common problems while communicating with Polish people?

[check from 1 minimum to 7 maximum of relevance]

Verbal misunderstanding (misunderstanding about the meaning of the words)

Vocal misunderstanding (tone of voice)

Non-verbal misunderstanding (body language)

Others:

1. Should medical students be trained in intercultural communication?

[Yes/No]

1. During your studies in Poland, have you ever encountered any prejudices towards you due to:

[Yes/ No]

Gender

Age

Nationality

Religion

Sexual orientation

Ethnicity

1. Your gender: female/ male/intersex/non-binary/prefer not to say
2. Your country of origin (can be more than one):
3. The cultural/religious background of a patient might be important during the treatment. Please indicate the degree to which you agree or disagree with each item using the following five-point scale: Strongly Disagree = 1; Disagree = 1; Neutral = 3; Agree = 4; Strongly Agree = 5.
4. I should inform medical professionals about my cultural/religious habits when it is relevant to the treatment process (for example, diet). Please indicate the degree to which you agree or disagree with each item using the following five-point scale: Strongly Disagree = 1; Disagree = 1; Neutral = 3; Agree = 4; Strongly Agree = 5.
5. According to your knowledge, what are the most common problems in relationships between physicians and patients from different countries? [rank from 1 minimum to 10 maximum of importance]

Verbal misunderstanding (misunderstanding about the meaning of the words)

Vocal misunderstanding (tone of voice)

Different non-verbal communication (body language)

Different religion

Different views on abortion

Different views on euthanasia

Different relationships between males and females

Different relationships between old and young people

Different diet

Different clothing

Others, please specify:

1. What are the differences between Polish and your own country’s attitudes toward medical personnel?
2. What are the differences between Polish and your own country’s attitudes toward sickness?
3. In your opinion, what Polish habits/rules/attitudes would not be accepted in your country?
4. In your opinion, what habits/rules/attitudes from your own country wouldn’t be accepted in Poland?

Thank you for completing the survey!
